# Supplementary material
Source: PubMed Central journal article supplement (PMC3864008)
Supplement: NIHMS399178-supplement-1.pdf [file NIHMS399178-supplement-1.pdf]

## **SUPPLEMENTAL MATERIAL**

**Supplementary Table 1.** Coefficient of variation of the studied 4 serum biomarkers

| <b>Serum Biomarkers, CV*</b> | <b>African Americans</b> | <b>Whites</b> |
|------------------------------|--------------------------|---------------|
| Fractalkine (pg/mL)          | 0.36                     | 0.39          |
| P-selectin (ng/mL)           | 0.33                     | 0.34          |
| Platelet factor 4 (ng/mL)    | 0.45                     | 0.44          |
| TNF $\alpha$ (pg/mL)         | 1.13                     | 1.08          |

\* Coefficient of variation is defined as the ratio of the standard deviation to the mean

**Supplementary Table 2.** Association of rs1429637 and rs1435520 SNPs with serum PF4 levels under different genetic models

| SNP       | Position   | Model     | Genotypes | African Americans |      |        |       |        | Whites     |      |        |       |        | Combined   |      |        |       |        |
|-----------|------------|-----------|-----------|-------------------|------|--------|-------|--------|------------|------|--------|-------|--------|------------|------|--------|-------|--------|
|           |            |           |           | PF4 levels        |      | 95% CI |       | P      | PF4 levels |      | 95% CI |       | P      | PF4 levels |      | 95% CI |       | P      |
|           |            |           |           | Mean              | SE   | Lower  | Upper |        | Mean       | SE   | Lower  | Upper |        | Mean       | SE   | Lower  | Upper |        |
|           |            |           |           |                   |      |        |       |        |            |      |        |       |        |            |      |        |       |        |
| rs1429637 | 75,052,310 | Dominant  | CC        | 9.72              | 0.01 | -      | -     | 0.06   | 9.82       | 0.02 | -      | -     | 0.011  | 9.76       | 0.01 | -      | -     | 0.0016 |
|           |            |           | CT-TT     | 9.62              | 0.04 | -0.2   | 0     |        | 9.68       | 0.04 | -0.22  | -0.03 |        | 9.66       | 0.03 | -0.18  | -0.04 |        |
|           |            | Recessive | CC-CT     | 9.71              | 0.01 | -      | -     | 0.0039 | 9.8        | 0.02 | -      | -     | 0.613  | 9.75       | 0.01 |        |       | 0.02   |
|           |            |           | TT        | 8.83              | 0.41 | -1.44  | -0.28 |        | 9.67       | 0.26 | -0.76  | 0.45  |        | 9.25       | 0.32 | -0.91  | -0.08 |        |
| rs1435520 | 75,064,281 | Dominant  | AA        | 9.71              | 0.01 | -      | -     | 0.045  | 9.82       | 0.02 | -      | -     | 0.0084 | 9.75       | 0.01 | -      | -     | 0.0009 |
|           |            |           | AC-CC     | 9.58              | 0.07 | -0.28  | 0     |        | 9.67       | 0.05 | -0.24  | -0.04 |        | 9.64       | 0.04 | -0.22  | -0.06 |        |
|           |            | Recessive | AA-AC     | 9.71              | 0.01 | -      | -     | 0.0023 | 9.8        | 0.02 | -      | -     | 0.613  | 9.75       | 0.01 | -      | -     | 0.03   |
|           |            |           | CC        | 8.41              | 0    | -2.1   | -0.46 |        | 9.67       | 0.26 | -0.76  | 0.45  |        | 9.25       | 0.45 | -1     | -0.04 |        |

**Supplementary Table 3.** Conditional analysis of rs183028 in the PF4 region

| SNPs             | Position          | Coded/<br>Noncoded<br>Allele | African Americans       |          |                                                 | Whites                  |          |                                                 | Combined                                        |
|------------------|-------------------|------------------------------|-------------------------|----------|-------------------------------------------------|-------------------------|----------|-------------------------------------------------|-------------------------------------------------|
|                  |                   |                              | Coded<br>Allele<br>Freq | Rsq*     | rs183028<br>Conditional<br>P-value <sup>†</sup> | Coded<br>Allele<br>Freq | Rsq*     | rs183028<br>Conditional<br>P-value <sup>†</sup> | rs183028<br>Conditional<br>P-value <sup>†</sup> |
| <b>rs1429637</b> | <b>75,052,310</b> | T/C                          | <b>0.036</b>            | <b>1</b> | <b>0.034</b>                                    | <b>0.060</b>            | <b>1</b> | <b>0.02</b>                                     | <b>0.002</b>                                    |
| rs351997         | 75,052,923        | T/C                          | 0.087                   | 1        | 0.622                                           | 0.090                   | 1        | 0.57                                            | 0.82                                            |
| rs6813952        | 75,063,296        | C/A                          | 0.073                   | 1        | 0.109                                           | 0.059                   | 1        | 0.03                                            | 0.07                                            |
| <b>rs1435520</b> | <b>75,064,281</b> | <b>C/A</b>                   | <b>0.019</b>            | <b>1</b> | <b>0.025</b>                                    | <b>0.053</b>            | <b>1</b> | <b>0.02</b>                                     | <b>0.001</b>                                    |
| rs352004         | 75,065,434        | T/C                          | 0.253                   | 1        | 0.918                                           | 0.008                   | 1        | 0.10                                            | 0.93                                            |
| rs352007         | 75,066,156        | G/C                          | 0.440                   | 0.97     | 0.781                                           | 0.092                   | 0.95     | 0.99                                            | 0.44                                            |
| rs394408         | 75,068,216        | T/C                          | 0.407                   | 0.98     | 0.220                                           | 0.091                   | 0.98     | 0.72                                            | 0.32                                            |
| rs447206         | 75,068,787        | A/G                          | 0.060                   | 0.99     | 0.301                                           | 0.088                   | 0.99     | 0.67                                            | 0.17                                            |
| rs168449         | 75,069,487        | T/C                          | 0.407                   | 0.98     | 0.690                                           | 0.091                   | 0.99     | 0.81                                            | 0.72                                            |
| rs191601         | 75,069,569        | C/T                          | 0.406                   | 0.98     | 0.690                                           | 0.091                   | 0.99     | 0.75                                            | 0.34                                            |
| rs193263         | 75,069,687        | T/A                          | 0.406                   | 0.98     | 0.690                                           | 0.091                   | 0.99     | 0.76                                            | 0.34                                            |
| rs442155         | 75,070,096        | G/A                          | 0.060                   | 1        | 0.301                                           | 0.088                   | 1        | 0.70                                            | 0.17                                            |
| rs377579         | 75,070,524        | T/C                          | 0.412                   | 0.99     | 0.800                                           | 0.091                   | 0.99     | 0.99                                            | 0.69                                            |
| rs352009         | 75,070,557        | G/A                          | 0.406                   | 0.98     | 0.820                                           | 0.091                   | 0.99     | 0.72                                            | 0.41                                            |
| <b>rs183028</b>  | <b>75,070,782</b> | <b>A/G</b>                   | <b>0.412</b>            | <b>1</b> | <b>-</b>                                        | <b>0.091</b>            | <b>1</b> | <b>-</b>                                        | <b>-</b>                                        |
| rs352010         | 75,074,095        | A/G                          | 0.409                   | 0.97     | 0.800                                           | 0.094                   | 0.96     | 0.97                                            | 0.73                                            |
| rs552582         | 75,074,722        | A/G                          | 0.497                   | 0.95     | 0.254                                           | 0.100                   | 0.96     | 0.76                                            | 0.58                                            |
| rs2457996        | 75,075,399        | C/T                          | 0.409                   | 0.97     | 0.119                                           | 0.091                   | 0.99     | 0.96                                            | 0.78                                            |
| rs187080         | 75,075,527        | T/C                          | 0.416                   | 0.97     | 0.302                                           | 0.093                   | 0.98     | 0.39                                            | 0.73                                            |
| rs426901         | 75,076,379        | G/A                          | 0.455                   | 0.96     | 0.260                                           | 0.098                   | 0.98     | 0.28                                            | 0.11                                            |
| rs409336         | 75,076,522        | C/A                          | 0.538                   | 1        | 0.167                                           | 0.104                   | 1        | 0.53                                            | 0.33                                            |
| rs416046         | 75,076,546        | A/G                          | 0.053                   | 0.84     | 0.357                                           | 0.072                   | 0.81     | 0.59                                            | 0.16                                            |
| rs440676         | 75,076,834        | C/A                          | 0.424                   | 0.96     | 0.290                                           | 0.095                   | 0.98     | 0.35                                            | 0.15                                            |
| rs450373         | 75,076,915        | G/A                          | 0.424                   | 0.96     | 0.290                                           | 0.095                   | 0.98     | 0.35                                            | 0.14                                            |
| rs2564594        | 75,077,164        | T/A                          | 0.424                   | 0.96     | 0.290                                           | 0.095                   | 0.98     | 0.34                                            | 0.14                                            |
| rs420389         | 75,077,352        | G/C                          | 0.424                   | 0.96     | 0.290                                           | 0.095                   | 0.98     | 0.34                                            | 0.13                                            |
| rs2437285        | 75,079,102        | T/C                          | 0.412                   | 1        | 0.336                                           | 0.102                   | 1        | 0.44                                            | 0.61                                            |
| rs352047         | 75,080,954        | C/G                          | 0.427                   | 0.98     | 0.060                                           | 0.098                   | 0.98     | 0.10                                            | 0.10                                            |
| rs425535         | 75,082,861        | T/C                          | 0.416                   | 0.98     | 0.070                                           | 0.099                   | 0.99     | 0.10                                            | 0.10                                            |
| rs352046         | 75,083,414        | G/C                          | 0.425                   | 0.99     | 0.070                                           | 0.100                   | 0.99     | 0.10                                            | 0.10                                            |

Positions are in reference to NCBI build 36.3

\*Squared correlation between imputed and true genotypes. Directly genotyped SNPs are marked as 1

<sup>†</sup>Uncorrected conditional P-values

Significant SNP and the P-values for their association are highlighted in bold

**Supplementary Table 4.** Association analysis of *PF4* variants with serum TNF $\alpha$  levels

| SNP              | Position          | Coded/<br>Noncoded<br>Allele | African Americans       |              |              |              |              |              |                                | Caucasians              |              |              |              |             | Combined     |              |             |             |
|------------------|-------------------|------------------------------|-------------------------|--------------|--------------|--------------|--------------|--------------|--------------------------------|-------------------------|--------------|--------------|--------------|-------------|--------------|--------------|-------------|-------------|
|                  |                   |                              | Coded<br>Allele<br>Freq | Rsq*         | $\beta$ †    | SE           | P            | Pc           | rs8180167<br>Conditional<br>P‡ | Coded<br>Allele<br>Freq | Rsq*         | $\beta$ †    | SE           | P           | $\beta$ ‡    | SE           | P           | Pc          |
| rs10017182       | 75,050,352        | G/A                          | 0.799                   | 0.940        | 0.015        | 0.007        | 0.025        | 0.18         | 0.83                           | 0.183                   | 0.966        | 0.003        | 0.006        | 0.61        | 0.010        | 0.005        | 0.03        | 0.18        |
| <b>rs8180167</b> | <b>75,052,237</b> | <b>A/T</b>                   | <b>0.752</b>            | <b>0.987</b> | <b>0.016</b> | <b>0.006</b> | <b>0.008</b> | <b>0.048</b> | -                              | <b>0.180</b>            | <b>0.982</b> | <b>0.003</b> | <b>0.006</b> | <b>0.66</b> | <b>0.011</b> | <b>0.004</b> | <b>0.01</b> | <b>0.07</b> |
| rs1429637        | 75,052,310        | C/T                          | 0.964                   | 1            | -0.010       | 0.017        | 0.531        | 0.99         | 0.64                           | 0.940                   | 1            | -0.015       | 0.008        | 0.14        | -0.013       | 0.008        | 0.15        | 0.55        |
| rs1595008        | 75,053,322        | C/A                          | 0.798                   | 0.949        | 0.015        | 0.007        | 0.024        | 0.19         | 0.87                           | 0.179                   | 0.962        | 0.003        | 0.006        | 0.61        | 0.010        | 0.005        | 0.03        | 0.19        |
| rs1595009        | 75,053,520        | C/T                          | 0.812                   | 0.878        | 0.016        | 0.007        | 0.025        | 0.19         | 0.86                           | 0.230                   | 0.717        | 0.003        | 0.006        | 0.64        | 0.010        | 0.005        | 0.04        | 0.19        |
| rs2175498        | 75,054,231        | A/G                          | 0.800                   | 0.954        | 0.015        | 0.007        | 0.025        | 0.19         | 0.86                           | 0.180                   | 0.975        | 0.003        | 0.006        | 0.63        | 0.010        | 0.005        | 0.03        | 0.19        |
| rs4694659        | 75,056,016        | C/A                          | 0.800                   | 0.954        | 0.015        | 0.007        | 0.025        | 0.19         | 0.86                           | 0.179                   | 0.973        | 0.003        | 0.006        | 0.65        | 0.010        | 0.005        | 0.04        | 0.19        |
| rs4694180        | 75,056,266        | T/C                          | 0.800                   | 0.954        | 0.015        | 0.007        | 0.025        | 0.19         | 0.86                           | 0.179                   | 0.973        | 0.003        | 0.006        | 0.65        | 0.010        | 0.005        | 0.04        | 0.19        |
| rs6446973        | 75,057,336        | A/T                          | 0.800                   | 0.954        | 0.015        | 0.007        | 0.026        | 0.19         | 0.87                           | 0.179                   | 0.973        | 0.003        | 0.006        | 0.65        | 0.009        | 0.005        | 0.04        | 0.19        |
| rs6820253        | 75,057,935        | C/T                          | 0.582                   | 0.974        | -0.011       | 0.005        | 0.044        | 0.29         | 0.37                           | 0.901                   | 0.982        | 0.006        | 0.008        | 0.41        | -0.007       | 0.004        | 0.13        | 0.57        |
| rs4694660        | 75,059,309        | T/A                          | 0.800                   | 0.955        | 0.015        | 0.007        | 0.026        | 0.19         | 0.87                           | 0.179                   | 0.973        | 0.003        | 0.006        | 0.66        | 0.009        | 0.005        | 0.04        | 0.20        |
| rs4694661        | 75,059,477        | A/T                          | 0.800                   | 0.955        | 0.015        | 0.007        | 0.026        | 0.19         | 0.87                           | 0.179                   | 0.973        | 0.003        | 0.006        | 0.66        | 0.009        | 0.005        | 0.04        | 0.20        |
| rs1594230        | 75,060,249        | C/T                          | 0.582                   | 0.976        | -0.011       | 0.005        | 0.043        | 0.29         | 0.37                           | 0.901                   | 0.985        | 0.006        | 0.008        | 0.41        | -0.007       | 0.004        | 0.13        | 0.57        |
| rs1594229        | 75,060,428        | C/G                          | 0.582                   | 0.977        | -0.011       | 0.005        | 0.043        | 0.29         | 0.37                           | 0.901                   | 0.985        | 0.006        | 0.008        | 0.41        | -0.007       | 0.004        | 0.13        | 0.57        |
| rs6810940        | 75,061,053        | C/T                          | 0.801                   | 0.957        | 0.015        | 0.007        | 0.026        | 0.19         | 0.88                           | 0.178                   | 0.974        | 0.003        | 0.006        | 0.67        | 0.009        | 0.005        | 0.04        | 0.20        |
| rs1836663        | 75,061,436        | T/C                          | 0.582                   | 0.979        | -0.011       | 0.005        | 0.042        | 0.25         | 0.36                           | 0.901                   | 0.987        | 0.006        | 0.008        | 0.41        | -0.007       | 0.004        | 0.13        | 0.51        |
| rs2472655        | 75,061,882        | T/C                          | 0.582                   | 0.979        | -0.011       | 0.005        | 0.042        | 0.25         | 0.36                           | 0.901                   | 0.988        | 0.006        | 0.008        | 0.41        | -0.007       | 0.004        | 0.13        | 0.51        |
| rs1156554        | 75,063,996        | C/T                          | 0.584                   | 0.970        | -0.012       | 0.005        | 0.032        | 0.20         | 0.34                           | 0.901                   | 0.996        | 0.006        | 0.008        | 0.40        | -0.007       | 0.005        | 0.10        | 0.44        |
| rs1156553        | 75,064,018        | T/G                          | 0.591                   | 0.995        | -0.012       | 0.005        | 0.033        | 0.20         | 0.33                           | 0.901                   | 0.997        | 0.006        | 0.008        | 0.40        | -0.007       | 0.005        | 0.11        | 0.44        |
| rs1435520        | 75,064,281        | A/C                          | 0.981                   | 1            | -0.004       | 0.033        | 0.866        | 0.99         | 0.96                           | 0.947                   | 1            | -0.017       | 0.008        | 0.10        | -0.014       | 0.010        | 0.19        | 0.63        |
| rs168449         | 75,069,487        | T/C                          | 0.407                   | 0.980        | 0.001        | 0.006        | 0.816        | 0.99         | 0.55                           | 0.091                   | 0.988        | -0.015       | 0.007        | 0.08        | -0.003       | 0.005        | 0.51        | 0.99        |
| rs183028         | 75,070,782        | A/G                          | 0.412                   | 1            | 0.002        | 0.006        | 0.780        | 0.99         | 0.60                           | 0.091                   | 1            | -0.015       | 0.007        | 0.08        | -0.003       | 0.005        | 0.54        | 0.99        |
| rs2472649        | 75,076,572        | A/G                          | 0.819                   | 1            | 0.012        | 0.006        | 0.064        | 0.31         | 0.78                           | 0.165                   | 1            | -0.008       | 0.006        | 0.21        | 0.004        | 0.005        | 0.40        | 0.92        |
| rs12512838       | 75,078,267        | C/T                          | 0.817                   | 0.928        | 0.012        | 0.007        | 0.078        | 0.36         | 0.70                           | 0.201                   | 0.772        | -0.008       | 0.006        | 0.21        | 0.004        | 0.005        | 0.44        | 0.94        |

Positions are in reference to NCBI build 36.3

\*Squared correlation between imputed and true genotypes. Directly genotyped SNPs are marked as 1

†Effect size of the coded allele based on the multivariate linear regression adjusted for age and sex (using allele dosages)

‡Effect size of the coded allele based on the multivariate linear regression adjusted for age, sex and race (using allele dosages)

Corrected P-values (Pc) were generated by gene-wide multiple correction (maximum likelihood genotypes) using 5000 permutations

¶ Uncorrected conditional P-values

Most significant SNP and the P-values for their association are highlighted in bold

**Supplementary Table 5.** Association of *CX3CR1* previously reported SNPs with serum fractalkine levels

| Chr | SNP                             | Position          | Coded/<br>Noncoded<br>Allele | African Americans       |             |             |             | Caucasians              |             |             |             | Combined    |             |             |
|-----|---------------------------------|-------------------|------------------------------|-------------------------|-------------|-------------|-------------|-------------------------|-------------|-------------|-------------|-------------|-------------|-------------|
|     |                                 |                   |                              | Coded<br>Allele<br>Freq | $\beta$ †   | SE          | P           | Coded<br>Allele<br>Freq | $\beta$ †   | SE          | P           | $\beta$ ‡   | SE          | P           |
| 3   | <b>rs3732378</b><br>(Thr280Met) | <b>39,282,166</b> | A/G                          | <b>0.028</b>            | <b>0.04</b> | <b>0.05</b> | <b>0.43</b> | <b>0.18</b>             | <b>0.05</b> | <b>0.02</b> | <b>0.05</b> | <b>0.04</b> | <b>0.02</b> | <b>0.04</b> |
| 3   | rs3732379<br>(Val249Ile)        | 39,282,260        | T/C                          | 0.119                   | 0.006       | 0.02        | 0.81        | 0.287                   | 0.003       | 0.02        | 0.89        | 0.004       | 0.02        | 0.78        |

Positions are in reference to NCBI build 36.3

†Effect size of the coded allele based on the multivariate linear regression adjusted for age and sex

‡Effect size of the coded allele based on the multivariate linear regression adjusted for age, sex and race

Marginal significant SNP and the P-values for the association are highlighted in bold
